# Supplementary material for: Similarity-based metric analysis approach for predicting osteogenic differentiation correlation coefficients and discovering the novel osteogenic-related gene FOXA1 in BMSCs
Source: PeerJ journal article supplement (doi:10.7717/peerj.18068), 2024-09-19
Supplement: stemcells.pdf [file stemcells.pdf]

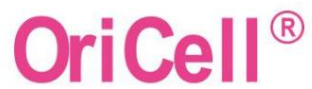

## Product test report

**OriCell® Adult Bone Marrow Mesenchymal Stem Cells**

**Product number: HUXMA-01001**

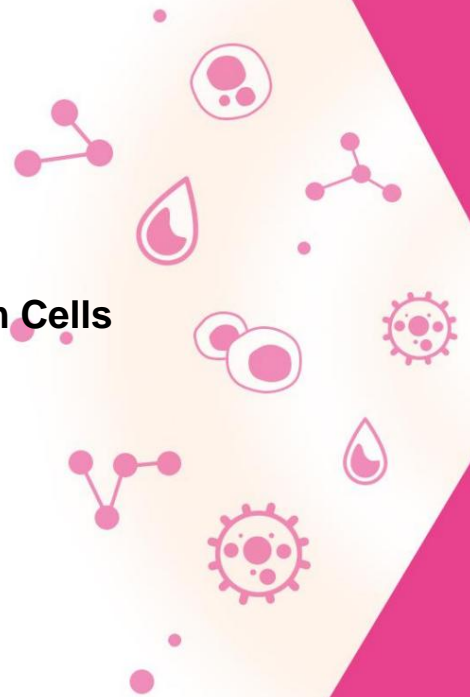

Basic Information

|                          |                                                   |
|--------------------------|---------------------------------------------------|
| product name             | OriCell® Adult Bone Marrow Mesenchymal Stem Cells |
| Part Number              | HUXMA-01001                                       |
| batch number             | 210406H61                                         |
| Donor information        | male                                              |
| Cryopreservation passage | P2                                                |
| Storage Conditions       | Liquid nitrogen (-196°C)                          |

Testing standards and results

| Test items                                            |                                                             |       | Test results                                                                                                 | Testing standards                                                                                 | in conclusion |
|-------------------------------------------------------|-------------------------------------------------------------|-------|--------------------------------------------------------------------------------------------------------------|---------------------------------------------------------------------------------------------------|---------------|
| often<br>regulation<br>inspection<br>Measurement      | Bacteria, fungi                                             |       | Negative                                                                                                     | Negative                                                                                          | Passed        |
|                                                       | Mycoplasma                                                  |       | Negative                                                                                                     | Negative                                                                                          | Passed        |
|                                                       | Endotoxins                                                  |       | ≤10EU                                                                                                        | ≤10EU                                                                                             | Passed        |
| Measurement<br>Certainty<br>Inspection<br>Measurement | Resuscitation survival rate                                 |       | 98.95%                                                                                                       | ≥80%                                                                                              | Passed        |
|                                                       | Number of living cells                                      |       | 1.88×10 <sup>6</sup>                                                                                         | ≥1×10 <sup>6</sup>                                                                                | Passed        |
|                                                       | Cell recovery and adhesion rate                             |       | 99.52%                                                                                                       | ≥80%                                                                                              | Passed        |
|                                                       | Growth status                                               |       | The morphology is long and spindle-like, with polar arrangement.<br>The population doubling time was 17.96 h | The morphology is long fusiform and arranged in polar pattern;<br>Population doubling time ≥ 72 h | Passed        |
|                                                       | surface<br>noodle<br>Standard<br>remember<br>point<br>Child | CD105 | 90.04%                                                                                                       | ≥70%                                                                                              | Passed        |
|                                                       |                                                             | CD29  | 99.08%                                                                                                       | ≥70%                                                                                              | Passed        |
|                                                       |                                                             | CD73  | 99.11%                                                                                                       | ≥70%                                                                                              | Passed        |
|                                                       |                                                             | CD34  | 0.80%                                                                                                        | ≤5%                                                                                               | Passed        |
|                                                       |                                                             | CD45  | 0.91%                                                                                                        | ≤5%                                                                                               | Passed        |
|                                                       |                                                             | CD11b | 0.80%                                                                                                        | ≤5%                                                                                               | Passed        |
|                                                       |                                                             | CD44  | 99.45%                                                                                                       | ≥70%                                                                                              | Passed        |

## Cell growth status

## Cell proliferation ability

The data of the logarithmic phase (1-2 days) were selected for calculation, and the cell population doubling time was found to be 17.96h.

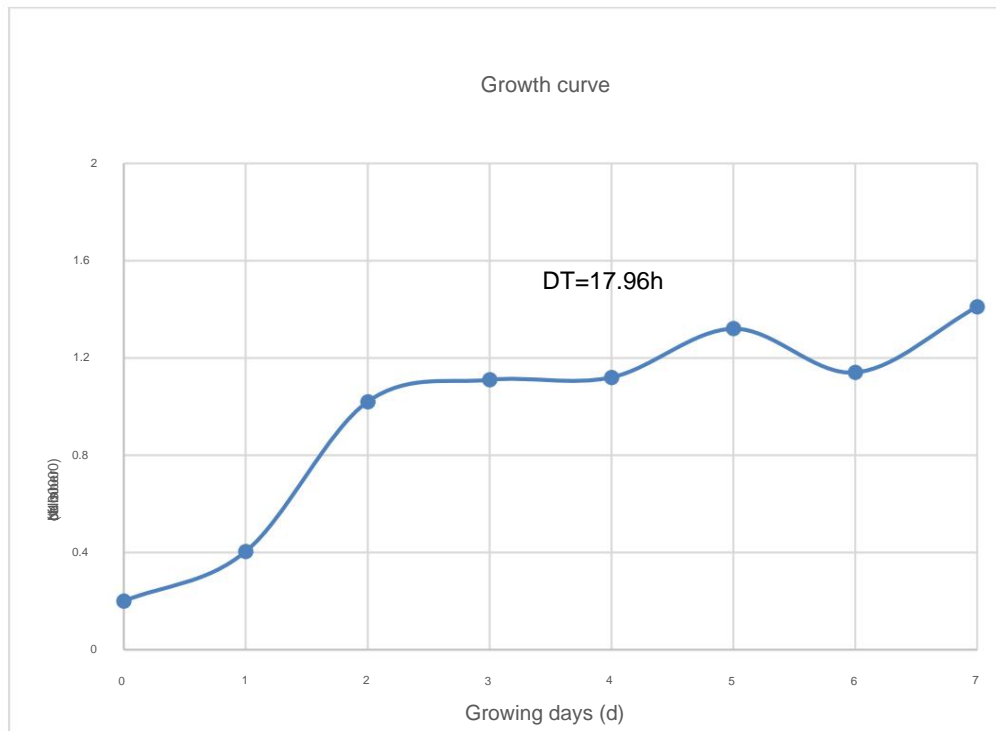

### Cell passaging capacity

The cells all grew in a long spindle shape with good polarity and three-dimensional sense. After 5 passages, the cells were still quite active.

The morphology of this batch of cells after 72 hours of growth in the Pn+1 generation

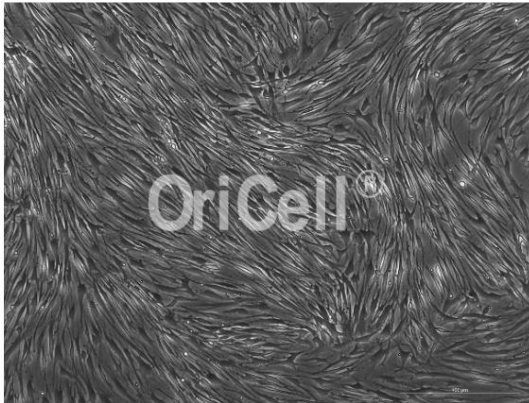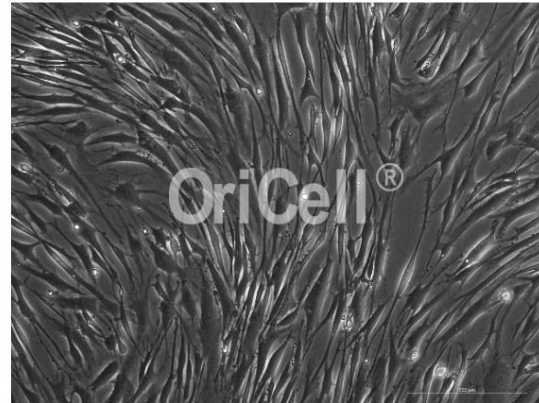

The morphology of this batch of cells after 48 hours of growth in the Pn+3 generation

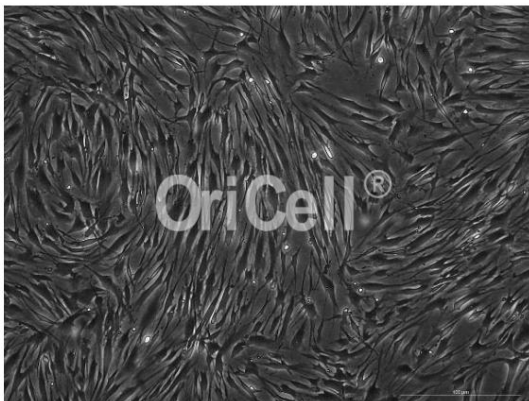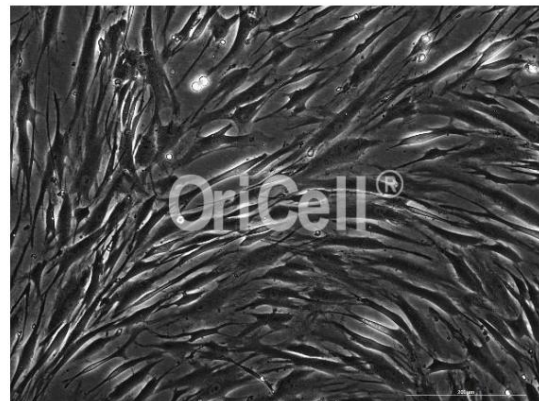

The morphology of this batch of cells after 48 hours of growth at generation Pn+5

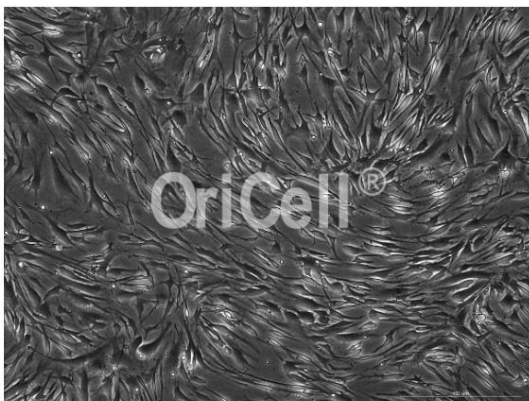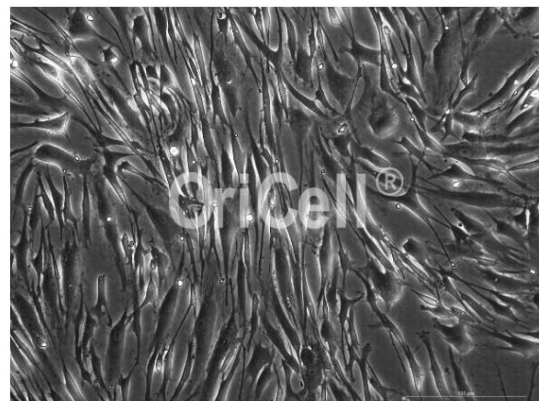



#### Induced differentiation ability

---

#### Adipogenic differentiation

When the cell confluence reached about 90%, mesenchymal stem cell adipogenesis induction medium was added. After 39 days, Oil Red O staining was performed, and red cells were visible.

More standard lipid droplets.

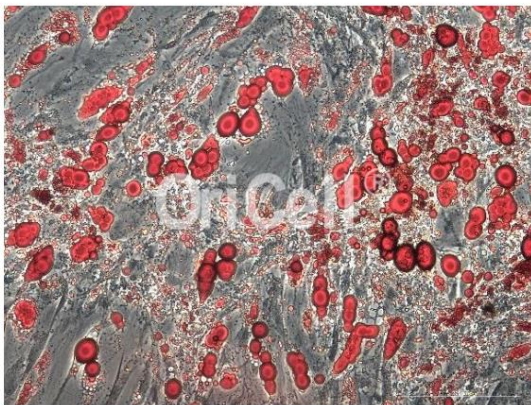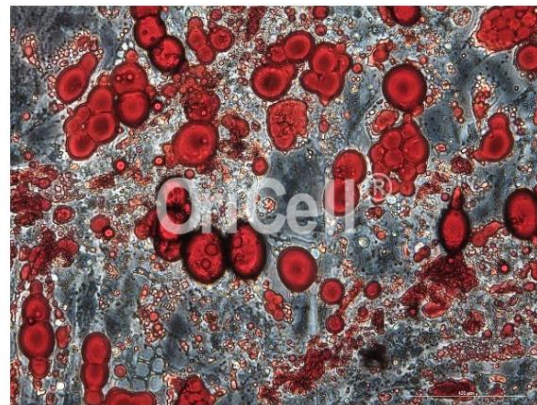

#### Osteogenic differentiation

When the cell confluence reached about 70%, the mesenchymal stem cell osteogenic induction solution was added, and Alizarin red staining was performed 35 days later.

Combined to form concentric circles of small dark red nodules.

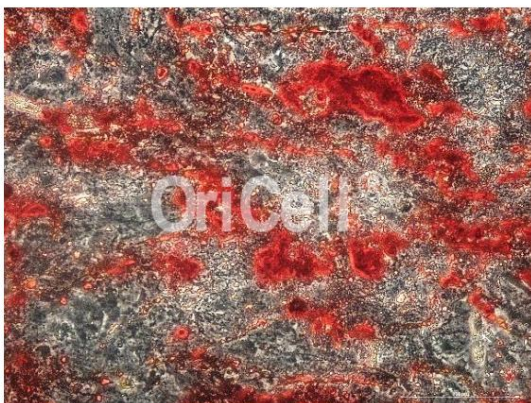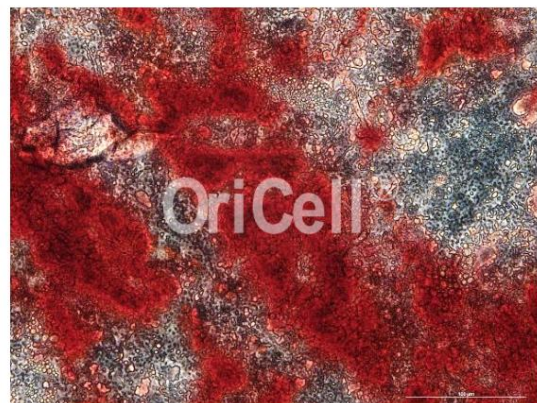

### Chondrogenic differentiation

After cell mass culture and mesenchymal stem cell chondrogenic induction medium induction culture, the cells gradually changed from flat cell masses attached to the bottom of the centrifuge tube to cells.

After 21 days of induction, the cell spheres became larger and rounder, and the surface became smooth.

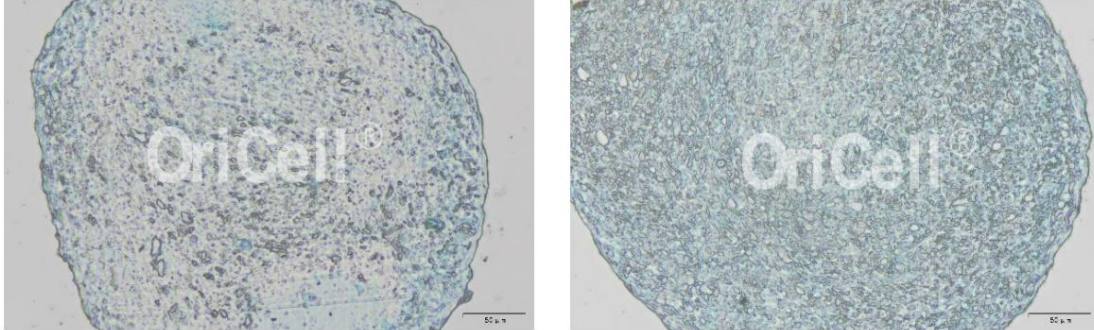

Surface molecular flow detection

Data Details

Mouse IgG1,  $\gamma$  Isotype Control Antibody

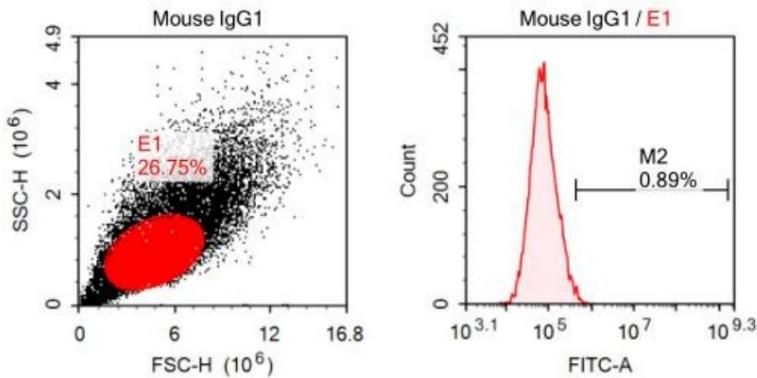

Anti-human CD105 antibody

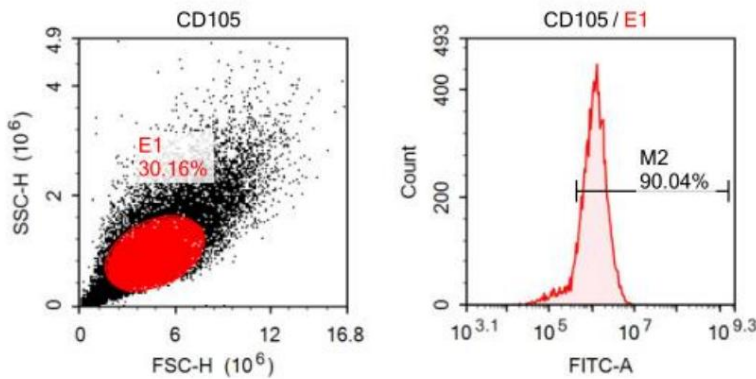

Anti-human CD29 antibody

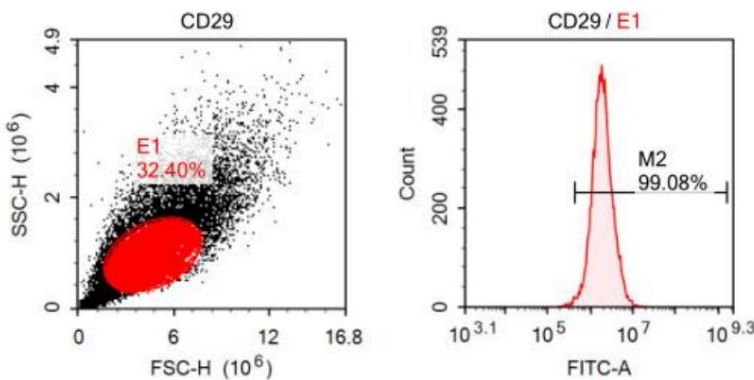



## Anti-human CD73 antibody

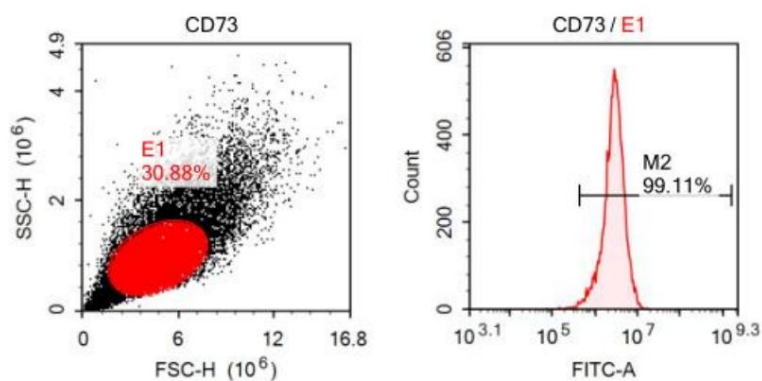

## Anti-human CD34 antibody

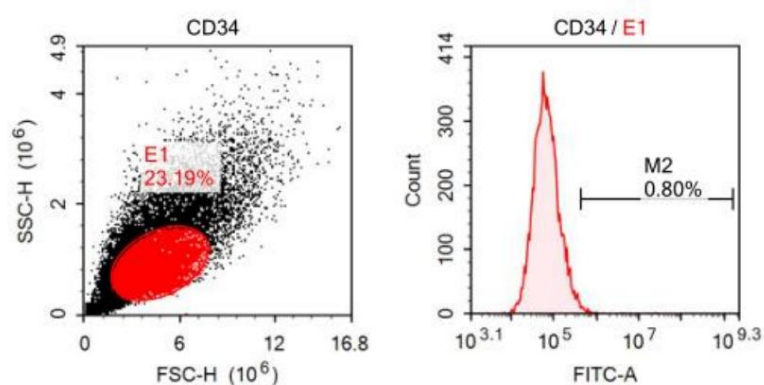

## Anti-human CD45 antibody

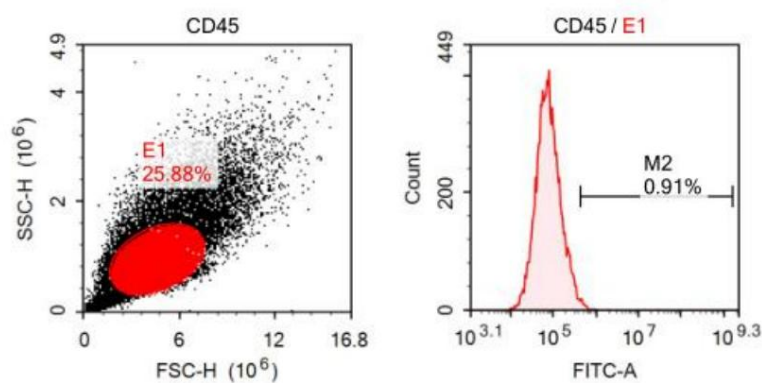

## Anti-human CD11b antibody

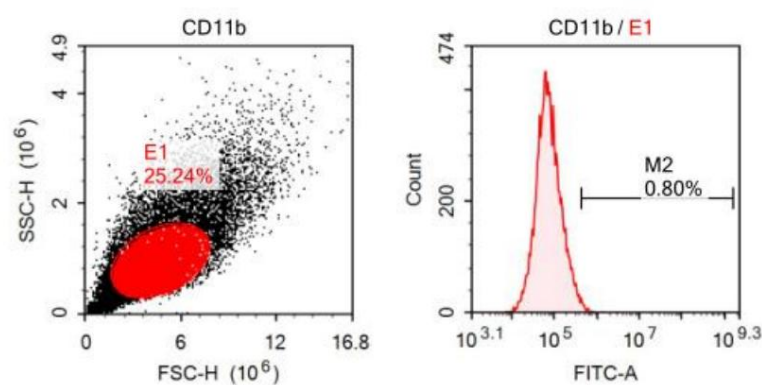



**Rat IgG2b,  $\gamma$  Isotype Control Antibody**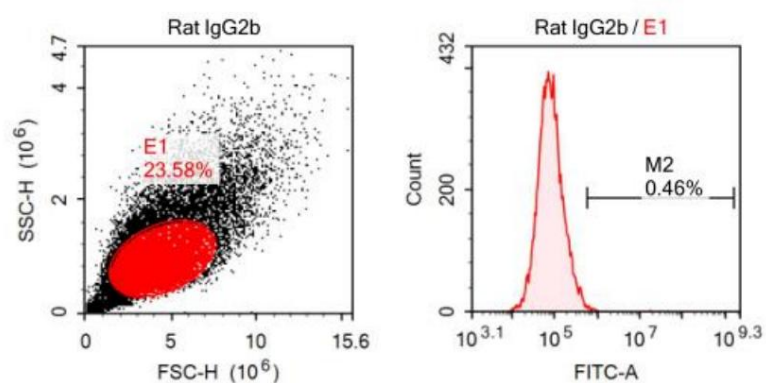**Anti-human CD44 antibody**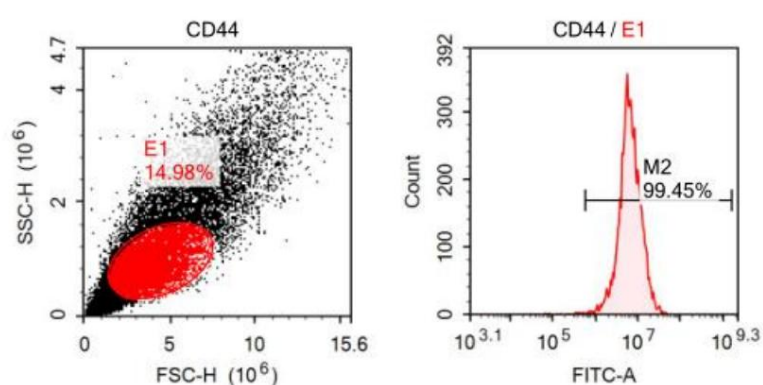

Saiye (Guangzhou) Biotechnology Co., Ltd. reserves all rights to the technical documents of OriCell® cell culture products.

Without the written permission of Saiye (Guangzhou) Biotechnology Co., Ltd., any part of this document may

It may not be adapted or reproduced for other commercial purposes.
