# Supplementary material for: Similarity-based metric analysis approach for predicting osteogenic differentiation correlation coefficients and discovering the novel osteogenic-related gene FOXA1 in BMSCs
Source: PeerJ. 2024 Sep 19;12:e18068. doi: 10.7717/peerj.18068 (PMC11416762; doi:10.7717/peerj.18068)
Supplement: Supplemental Information 2 [file peerj-12-18068-s002.xlsx]

## Sheet: ALP
KD-NC	KD	OE-NC	OE
1.12581	2.4328	1.4518	0.4831
1.03642	2.2461	1.2439	0.5513
0.82153	2.7816	1.2916	0.6215

## Sheet: ARS
KD-NC	KD	OE-NC	OE
0.83435	3.2384	1.2035	0.3814
1.20384	3.0235	1.3954	0.2764
0.98616	2.7965	1.1976	0.3265
